# Supplementary material for: Encapsulation of Combi-CLEAs of Glycosidases in Alginate Beads and Polyvinyl Alcohol for Wine Aroma Enhancement
Source: MDPI journal article supplement (doi:10.3390/catal11070866), 2021-07-20
Supplement: s1 [file s1]

Archive with 1 entries (1 files):
- catalysts-1301569-supplementary.pdf
